# Supplementary material
Source: publisher site journal article supplement (https://jamanetwork.com/journals/intemed/articlepdf/2530901/ioi160036supp1_prod.pdf)
Supplement: Supplementary file 1 [file ioi160036supp1_prod.pdf]

## Supplementary Online Content

Siegel KR, McKeever Bullard K, Imperatore G, et al. Association of higher consumption of foods derived from subsidized commodities with adverse cardiometabolic risk among US adults. *JAMA Intern Med*. Published online July 5, 2016.  
doi:10.1001/jamainternmed.2016.2410.

**eTable.** Adjusted Prevalence and Prevalence Ratio (PR) of Cardiometabolic Risk Factor Strata by Subsidy Score Quartiles, NHANES 2001-2006

This supplementary material has been provided by the authors to give readers additional information about their work.

**eTable.** Adjusted Prevalence and Prevalence Ratio (PR) of Cardiometabolic Risk Factor Strata by Subsidy Score Quartiles, NHANES 2001-2006

|                            |          | Q1   |             | Q2   |                    | Q3   |                    | Q4   |                    |
|----------------------------|----------|------|-------------|------|--------------------|------|--------------------|------|--------------------|
|                            | <i>n</i> | %    | PR (95% CI) | %    | PR (95% CI)        | %    | PR (95% CI)        | %    | PR (95% CI)        |
| <b>BMI</b>                 |          |      |             |      |                    |      |                    |      |                    |
| Normal                     | 3348     | 39.6 | 1.00 (ref)  | 37.0 | 0.93 (0.85 – 1.02) | 34.7 | 0.88 (0.80 – 0.96) | 31.4 | 0.79 (0.71 – 0.89) |
| Overweight                 | 3085     | 33.4 | 1.00 (ref)  | 33.5 | 1.00 (0.90 – 1.12) | 30.5 | 0.91 (0.80 – 1.04) | 31.7 | 0.95 (0.84 – 1.07) |
| Obese                      | 3103     | 26.9 | 1.00 (ref)  | 29.6 | 1.10 (0.99 – 1.21) | 34.8 | 1.29 (1.14 – 1.46) | 36.8 | 1.37 (1.23 – 1.52) |
| <b>Abdominal adiposity</b> |          |      |             |      |                    |      |                    |      |                    |
| <0.52                      | 3293     | 39.7 | 1.00 (ref)  | 35.7 | 0.90 (0.83 – 0.98) | 33.0 | 0.83 (0.75 – 0.92) | 28.7 | 0.72 (0.64 – 0.81) |
| 0.52 - <0.60               | 3064     | 32.5 | 1.00 (ref)  | 33.1 | 1.02 (0.91 – 1.15) | 32.6 | 1.01 (0.89 – 1.14) | 32.3 | 1.00 (0.88 – 1.13) |
| ≥0.60                      | 3318     | 27.8 | 1.00 (ref)  | 31.1 | 1.12 (1.01 – 1.24) | 34.4 | 1.24 (1.12 – 1.36) | 39.0 | 1.40 (1.27 – 1.55) |
| <b>CRP</b>                 |          |      |             |      |                    |      |                    |      |                    |
| 0.01 – 0.09                | 3089     | 37.9 | 1.00 (ref)  | 35.5 | 0.94 (0.84 – 1.05) | 32.8 | 0.86 (0.77 – 0.97) | 30.3 | 0.80 (0.72 – 0.89) |
| >0.09 - <0.32              | 2976     | 34.7 | 1.00 (ref)  | 32.6 | 0.94 (0.84 – 1.06) | 31.9 | 0.92 (0.82 – 1.04) | 32.9 | 0.95 (0.83 – 1.08) |
| ≥0.32                      | 3169     | 27.4 | 1.00 (ref)  | 31.8 | 1.16 (1.02 – 1.32) | 35.3 | 1.29 (1.17 – 1.42) | 36.9 | 1.34 (1.19- 1.51)  |
| <b>Blood Pressure</b>      |          |      |             |      |                    |      |                    |      |                    |
| Normal                     | 4568     | 28.1 | 1.00 (ref)  | 30.3 | 1.00 (0.92 – 1.09) | 28.3 | 1.04 (0.96 – 1.12) | 30.2 | 0.96 (0.88 – 1.06) |
| Pre-hypertension           | 2408     | 26.9 | 1.00 (ref)  | 24.8 | 0.92 (0.82 – 1.03) | 25.1 | 0.93 (0.80 – 1.08) | 26.5 | 0.99 (0.88 – 1.11) |
| Hypertension               | 2699     | 44.9 | 1.00 (ref)  | 44.9 | 1.08 (0.95 – 1.22) | 46.6 | 1.01 (0.89 – 1.14) | 43.3 | 1.07 (0.96 – 1.21) |
| <b>Lipids</b>              |          |      |             |      |                    |      |                    |      |                    |
| Normal                     | 3766     | 36.5 | 1.00 (ref)  | 35.2 | 0.96 (0.86 – 1.08) | 32.6 | 0.89 (0.80 – 1.00) | 33.2 | 0.91 (0.83 – 1.00) |
| Intermediate               | 2058     | 23.1 | 1.00        | 21.4 | 0.93 (0.80 – 1.08) | 21.3 | 0.92 (0.79 – 1.09) | 20.6 | 0.89 (0.78 – 1.03) |

|                             |      |      |               |      |                    |      |                    |      |                    |
|-----------------------------|------|------|---------------|------|--------------------|------|--------------------|------|--------------------|
| dyslipidemia                |      |      | (ref)         |      |                    |      |                    |      |                    |
| Dyslipidemia                | 3851 | 40.4 | 1.00<br>(ref) | 43.4 | 1.07 (0.97 – 1.19) | 46.2 | 1.14 (1.04 – 1.25) | 46.3 | 1.14 (1.05 – 1.25) |
| Glycemia                    |      |      |               |      |                    |      |                    |      |                    |
| Normal                      | 7479 | 85.1 | 1.00<br>(ref) | 85.7 | 1.01 (0.98 – 1.04) | 82.0 | 0.96 (0.94 – 0.99) | 82.1 | 0.96 (0.94 – 0.99) |
| Intermediate<br>dysglycemia | 1202 | 10.0 | 1.00<br>(ref) | 9.7  | 0.97 (0.77 – 1.23) | 12.0 | 1.20 (1.01 – 1.44) | 11.7 | 1.17 (0.95 – 1.45) |
| Diagnosed<br>diabetes       | 623  | 4.9  | 1.00<br>(ref) | 4.6  | 0.94 (0.69 – 1.30) | 6.0  | 1.23 (0.92 – 1.30) | 6.2  | 1.27 (0.94 – 1.72) |

Q1-4 = Quartile 1-4; PR = Prevalence ratio. Subsidy Score quartile cutoffs are Q1: 0 – 0.47; Q2: 0.48 – 0.57; Q3: 0.58 – 0.65; Q4: 0.66 – 1.0. Normal weight was defined as BMI <25 kg/m<sup>2</sup>, overweight was defined as 25 kg/m<sup>2</sup> ≤ BMI <30 kg/m<sup>2</sup>, and obesity as BMI ≥30 kg/m<sup>2</sup>. Abdominal adiposity was categorized into tertiles: normal, <0.52; moderately enlarged, ≥0.52 but <0.60; very enlarged, ≥0.60. CRP was categorized as: tertile 1, 0.01 – 0.09 mg/dL; tertile 2, >0.09 – <0.32 mg/dL; tertile 3, ≥0.32 mg/dL. Blood pressure was categorized as: normal (no self-reported diagnosis and systolic blood pressure [sBP]<120 and diastolic blood pressure [dBP]<80 mmHg); pre-hypertension (no self-reported diagnosis and sBP 120 to <140 or dBP 80 to <90); diagnosed (self-reported) or undiagnosed (no self-reported diagnosis and sBP≥140 or dBP≥90 mmHg) hypertension or currently taking anti-hypertensive medication. Lipids (nonHDL-c) was categorized similarly: normal (no self-reported diagnosis and nonHDL-c <130 mg/dL); intermediate dyslipidemia (no self-reported diagnosis and nonHDL-c 130 to <160 mg/dL); diagnosed (self-reported) or undiagnosed (no self-reported diagnosis and nonHDL-c ≥160 mg/dL) dyslipidemia or currently taking anti-cholesterolemia medication. Intermediate dysglycemia was defined as no self-reported diagnosis and glycated hemoglobin (HbA1C) ≥5.7%; diagnosed diabetes was defined as self-reported physician diagnosis. Individuals with no self-reported diagnosis and HbA1C <5.7% were categorized as normal.

Model adjusted for age, sex, race/ethnicity, educational attainment, poverty income ratio, smoking status, moderate/vigorous leisure-time physical activity, and total daily calorie intake. Individuals with missing data were excluded from the models.
